# Supplementary material
Source: PubMed Central journal article supplement (PMC7367056)
Supplement: NIHMS1576137-supplement-Supplemental_Material.pdf [file NIHMS1576137-supplement-Supplemental_Material.pdf]

## **SUPPLEMENTAL MATERIAL**

**Table I. Odds ratios from multivariable logistic regression model predicting no increase in pre-stroke disability at 90 days**

| <b>Predictor</b>                                                                                                                    | <b>Odds Ratio with 95% Confidence Interval</b> | <b>P-value</b> |
|-------------------------------------------------------------------------------------------------------------------------------------|------------------------------------------------|----------------|
| Moderate baseline disability                                                                                                        | 1.90 [1.24, 2.94]                              | 0.004          |
| Age                                                                                                                                 | 0.86 [0.59, 1.27]                              | 0.458          |
| Sex (Male)                                                                                                                          | 0.99 [0.97, 1.00]                              | 0.046          |
| Baseline NIH Stroke Scale                                                                                                           | 0.91 [0.88, 0.93]                              | <0.001         |
| mTICI 2b-3                                                                                                                          | 3.69 [1.72, 9.19]                              | 0.002          |
| Time to recanalization                                                                                                              | 1.00 [1.00, 1.00]                              | 0.08           |
| Baseline Glucose                                                                                                                    | 1.00 [0.99, 1.00]                              | 0.049          |
| Intravenous thrombolysis                                                                                                            | 1.00 [0.66, 1.52]                              | 0.995          |
| ASPECT score                                                                                                                        | 1.08 [0.96, 1.24]                              | 0.216          |
| ASPECT: Alberta Stroke Program Early CT; mTICI: Modified Thrombolysis in Cerebral Ischemia Score; NIH: National Institute of Health |                                                |                |

| <b>Table II. Odds ratios from multivariable logistic regression model predicting mortality by 90 days</b>                           |                                                |                |
|-------------------------------------------------------------------------------------------------------------------------------------|------------------------------------------------|----------------|
| <b>Predictor</b>                                                                                                                    | <b>Odds Ratio with 95% Confidence Interval</b> | <b>P-value</b> |
| Moderate baseline disability                                                                                                        | 2.83 [1.84, 4.37]                              | <0.001         |
| Age                                                                                                                                 | 1.04 [1.02, 1.06]                              | <0.001         |
| Sex (Male)                                                                                                                          | 1.51 [0.99, 2.33]                              | 0.057          |
| Baseline NIH Stroke Scale                                                                                                           | 1.10 [1.07, 1.14]                              | <0.001         |
| mTICI 2b-3                                                                                                                          | 0.44 [0.25, 0.78]                              | 0.005          |
| Time to recanalization                                                                                                              | 1.00 [1.00, 1.00]                              | 0.918          |
| Baseline Glucose                                                                                                                    | 1.00 [1.00, 1.01]                              | 0.005          |
| Intravenous thrombolysis                                                                                                            | 0.82 [0.52, 1.27]                              | 0.371          |
| ASPECT score                                                                                                                        | 0.86 [0.76, 0.98]                              | 0.024          |
| ASPECT: Alberta Stroke Program Early CT; mTICI: Modified Thrombolysis in Cerebral Ischemia Score; NIH: National Institute of Health |                                                |                |

| <b>Table III. Outcomes of patients with pre-stroke modified Rankin score 0-2 vs 3</b> |                 |               |         |
|---------------------------------------------------------------------------------------|-----------------|---------------|---------|
|                                                                                       | mRS 0-2 (n=609) | mRS 3 (n=152) | P-Value |
| Excellent functional outcome (%)                                                      | 191 (33.5)      | 46 (32.6)     | 0.921   |
| No increase in disability (%)                                                         | 124 (21.7)      | 46 (32.6)     | 0.008   |
| Symptomatic Intracerebral Hemorrhage (%)                                              | 42 (7.0)        | 10 (6.6)      | 1       |
| Successful recanalization (%)                                                         | 525 (86.2)      | 127 (83.6)    | 0.437   |

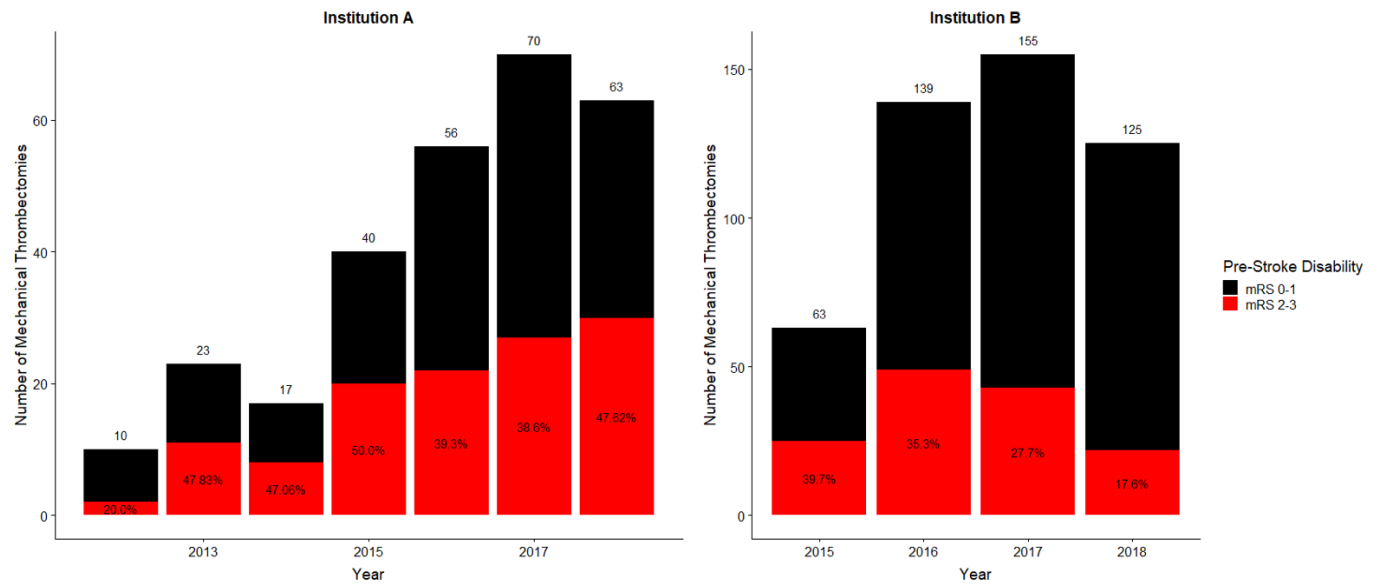

**Figure I.** Yearly rates of mechanical thrombectomy (MT) by each institution and proportion of patients with pre-stroke disability among those undergoing MT is outlined.

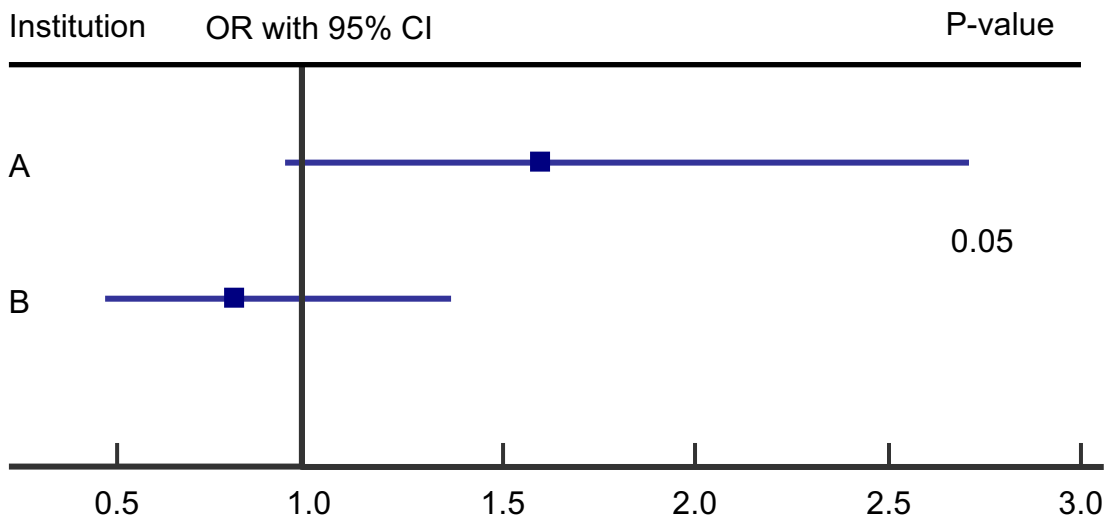

**Figure II.** Heterogeneity in achievement of the primary outcome of no increase in disability at 90-days between patients with no-to-minimal vs moderate pre-stroke disability according to institution. The odds of having no increase in disability at 90-days for each institution is depicted with a square and a line spanning it representing a 95% confidence interval on the forest plot.
